# Supplementary material
Source: Research Square preprint supplement (doi:10.21203/rs.3.rs-9140192/v1)
Supplement: Supplementary file 3 [file a51a5201270d0222a8efb672.xlsx]

## Sheet: Hoja1
Gene signatures
		#
Stromal Score		141	DCN	PAPPA	SFRP4	THBS2	LY86	CXCL14	FOXF1	COL10A1	ACTG2	APBB1IP	SH2D1A	SULF1	MSR1	C3AR1	FAP	PTGIS	ITGBL1	BGN	CXCL12	ECM2	FCGR2A	MS4A4A	CCN4	COL1A2	MS4A6A	EDNRA	VCAM1	ADGRA2	SCUBE2	AIF1	HEPH	LUM	PTGER3	RUNX1T1	CDH5	PIK3R5	RAMP3	LDB2	COX7A1	EDIL3	DDR2	FCGR2B	PLPPR4	COL15A1	AOC3	ITIH3	FMO1
Immune Score		141	LCP2	LSP1	FYB1	PLEK	HCK	OL10RA	LILRB1	NCKAP1L	LAIR1	NCF2	CYBB	PTPRC	IL7R	LAPTM5	CD53	EVI2B	SLA	ITGB2	GIMAP4	MYO1F	HCLS1	MNDA	IL2RG	CD48	AOAH	CCL5	LTB	GMFG	GIMAP6	GZMK	LST1	GPR65	LILRB2	WIPF1	CD37	BIN2	FCER1G	IKZF1	TYROBP	FGL2	FLI1	IRF8	ARHGAP15	SH2B3	TNFRSF1B	DOCK2	CD2
Fibroblast_FANTOM_1		126	ADD1	ADH1B	ALDH9A1	ANXA11	ARF4	ARHGAP6	C7	CACNA1C	CAMLG	CIRBP	CSF1	CYBA	DPT	DUT	FGF7	FMO2	FTL	GARS	GOLGA1	GSTM5	HEXA	HIC1	HPS1	HTR2B	IDUA	ISLR	JAK3	IPO5	LTBR	LTC4S	SMAD5	MGMT	MGST3	MMP17	MMP19	NFATC4	NFE2L2	P4HB	PDE4A	PFDN5	PGK1	PIK3R2	PRKG2	MASP1	PTGIR	RASA2	RNF4
Fibroblast_HPCA_1		34	ADH1B	C7	CACNA1C	CAMLG	FTL	HEXA	IDUA	ISLR	JAK3	IPO5	MGST3	NFATC4	NFE2L2	PRKG2	MASP1	PTGIR	RNH1	TBX5	TCF21	TFDP1	HAND2	BAG2	PRDX4	MTHFD2	XPOT	CSTF2T	ZNF771	ADI1	FBXL8	PCDHGA11	GPR137	KIAA1614	PAPPA2	C7orf25
Fibroblast_HPCA_2		61	ADH1B	ANXA11	ARF4	C7	CACNA1C	CAMLG	FTL	GOLGA1	HEXA	IDUA	ISLR	JAK3	IPO5	LTBR	SMAD5	MGST3	NFATC4	NFE2L2	PFDN5	PRKG2	MASP1	PTGIR	RNH1	TADA2A	TBX5	TCF21	TFDP1	VIM	CGGBP1	HAND2	BAG2	HDAC5	PRDX4	MTHFD2	KDELR1	TMEM115	XPOT	CSTF2T	DNPEP	MKRN2	TOR1AIP1	ZCCHC4	RASL12	ZNF771	ADI1	FBXL8	PCDHGA11
[truncated: 94 more columns]
