# Supplementary material
Source: Research Square preprint supplement (doi:10.21203/rs.3.rs-9140192/v1)
Supplement: Supplementary file 4 [file b34bf052b747f91c33ee8829.docx]

| **Gene symbol** | **logFC L/R** | **PValue** |
| --- | --- | --- |
| GJA1 | 7.702004762 | 3.0535E-09 |
| CACNB3 | 3.35791734 | 1.9137E-05 |
| AQP4 | 4.801946253 | 0.0014482 |
| LRRC8C | 2.573064732 | 0.01111008 |
| SCNN1B | 1.219607662 | 0.03071674 |
| CACNG1 | 4.162557424 | 0.03322828 |
| GABRE | 3.708278127 | 0.03789109 |
| GJC2 | 2.889021802 | 0.04325003 |

| **Gene symbol** | **logFC L/R** | **PValue** |
| --- | --- | --- |
| KCNK5 | -2.856867953 | 0.00245975 |
| TRPV5 | -4.95509918 | 0.00325448 |
| HTR3B | -1.823936731 | 0.00561715 |
| KCNK4 | -2.92670638 | 0.0071758 |
| KCNA1 | -2.481839165 | 0.0078417 |
| HCN1 | -2.781991155 | 0.00834969 |
| GABRG2 | -2.591643503 | 0.01413781 |
| SCN5A | -2.25009739 | 0.04000428 |
| HTR3A | -1.99740795 | 0.04621631 |
